# Supplementary material
Source: PubMed Central journal article supplement (PMC3281711)

## Supplemental Text

### Results

We co-administered NaHS (500 nM) and a range of concentrations of the K<sup>+</sup>ATP channel blocker glibenclamide while measuring TCR-driven proliferation (SI Fig. 1A). Unexpectedly, glibenclamide stimulated T cell proliferation in the absence of NaHS nearly 50% starting at the lowest dose (100 nM). Furthermore, Glibenclamide was unable to inhibit the stimulatory actions of NaHS at physiologically relevant concentrations<sup>37</sup> of 100 nM and 1  $\mu$ M. Due to the lack of effect of glibenclamide on NaHS stimulated proliferation, we concluded that the K<sup>+</sup>ATP channel does not play a role in the T cell effects of H<sub>2</sub>S.

Phosphodiesterases (PDEs) are another recently reported target of H<sub>2</sub>S signaling<sup>27</sup>. H<sub>2</sub>S was reported to inhibit the degradation of cGMP in smooth muscle cells at 10nM-50 $\mu$ M using semi-purified cGMP- and cAMP -specific isoforms. To address the effect of H<sub>2</sub>S on PDE activity in T cells, we used an NO donor to increase cGMP levels in Jurkat T cells with and without NaHS present (SI Fig. 1B). After 4 hours of treatment, there was no difference in the levels of cGMP in the NO or NO-NaHS co-treated cells. We conclude that H<sub>2</sub>S does not affect cGMP-sensitive PDEs and this is not the source of H<sub>2</sub>S-driven responses in T cells.

Next we investigated the source of the H<sub>2</sub>S-dependent stimulation of IL-2 expression to assess whether IL-2 promoter binding transcription factors are a target of H<sub>2</sub>S including the previously mentioned Akt MAPK target, NF $\kappa$ B. We transfected luciferase constructs of NFAT, NF $\kappa$ B, STAT5, CRE, and AP-1 into Jurkat T cells and measured their TCR-stimulated activities in the presence of H<sub>2</sub>S (SI Fig. 1C). While there were no significant effects of H<sub>2</sub>S on the transcription factor activities that were tested, NF $\kappa$ B showed a significant dose-dependent decrease in activity starting with 18% at 10 $\mu$ M NaHS. However, these concentrations are much higher than the effective concentrations cited earlier in this work, and while it may be interesting data for the pharmacological application of H<sub>2</sub>S, we conclude that its effect on NF $\kappa$ B does not contribute to the mechanism of H<sub>2</sub>S-dependent T cell proliferation.

**SI Fig. 1** (A) Mouse splenocytes were activated with plate-bound anti-CD3/CD28 antibodies in the presence of glibenclamide or vehicle and proliferation was assessed either in a 1% O<sub>2</sub> atmosphere via an MTS assay at 72 hours post activation. (B) Jurkat T cells (500,000 cells) were stimulated with DETANO (1μM) or DETANO with NaHS (300nM) for 4 hours in a 1% O<sub>2</sub> atmosphere, after which cGMP was measured. (C) Jurkat T cells were transfected with a luciferase reporter construct bearing the IL-2 promoter binding elements for NFκB as well as a constitutively expressed Renilla luciferase reporter construct. Cells were activated by plate bound anti-CD3 and anti CD28 antibodies in the presence of NaHS in a 1% O<sub>2</sub> atmosphere for 6 hours, after which the ratio of NFκB to Renilla luciferase activity was measured. Data are normalized to non-activated control for each treatment, n=3, error bars indicate standard deviation, \* denotes P < 0.05.

**SI Fig. 2** (A) Mouse CD3<sup>+</sup> cells were labeled with CFSE and activated with plate-bound anti-CD3/CD28 antibodies in the presence of 100 nM Na<sub>2</sub>S or vehicle and proliferation was assessed in a 1% O<sub>2</sub> atmosphere by flow cytometry at 72 hours post activation. (A) shows proliferation of CD4<sup>+</sup> and CD8<sup>+</sup> populations. (B) shows proliferation analysis of gated CD8<sup>+</sup> cells.

# Supplementary Information

## Figure 1

### A

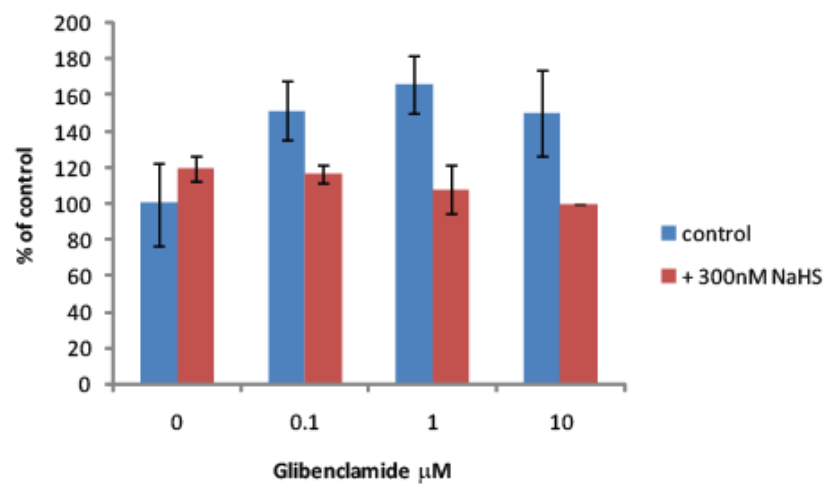

### B

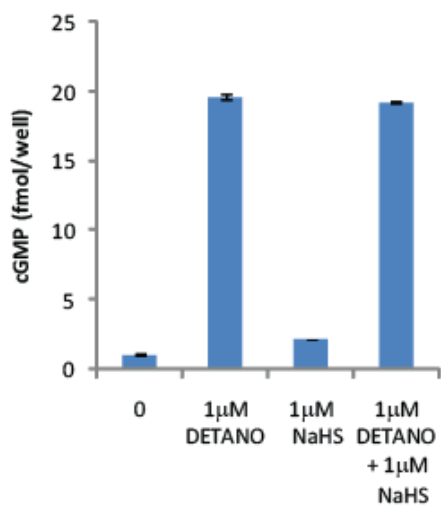

### C

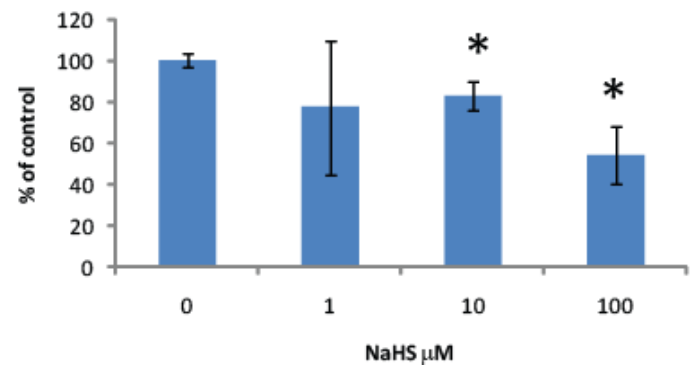

**Figure 2**

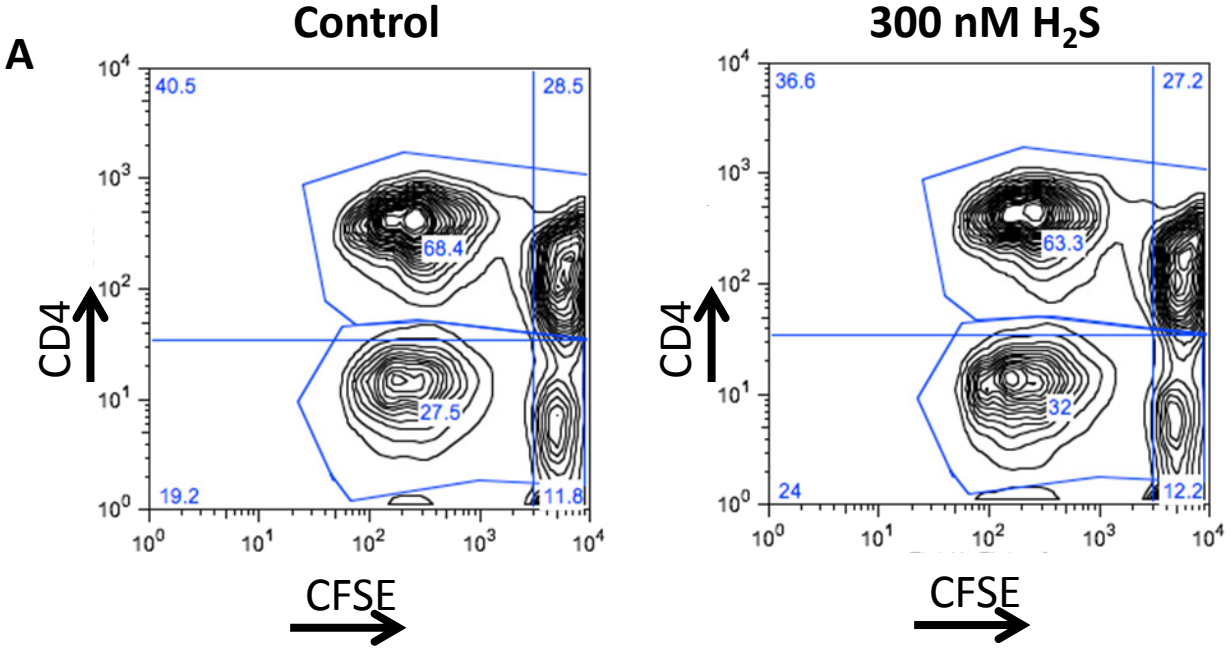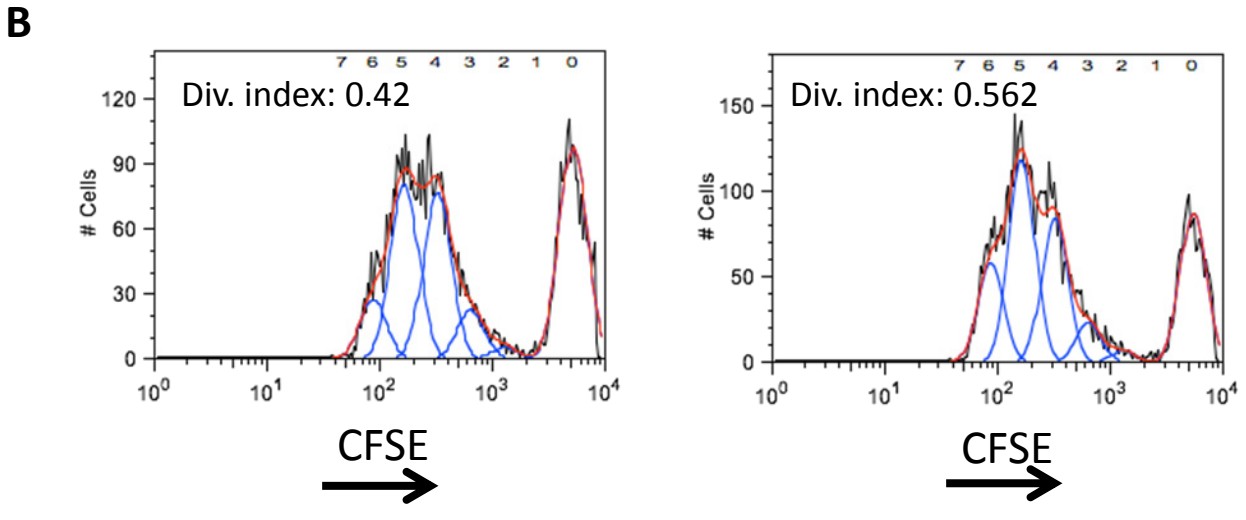

Supplement: supp_M111.307819_jbc.M111.307819-1.pdf [file supp_M111.307819_jbc.M111.307819-1.pdf]
